# Supplementary material for: First examples of oxaphosphirane pentacarbonylchromium(0) and -molybdenum(0) complexes: synthesis, structures and reactions
Source: Royal Society of Chemistry journal article supplement (doi:10.1039/c0dt01509a), 2011-01-01
Supplement: c0dt01509a.pdf [file c0dt01509a.pdf]

## Supplementary Material

### First Examples of Oxaphosphirane Pentacarbonylchromium(0) and -molybdenum(0) Complexes: Synthesis, Structures and Reactions

Carolin Albrecht<sup>a</sup>, Maren Bode,<sup>b</sup> Janaina Marinas Pérez,<sup>a</sup> Gregor Schnakenburg<sup>a</sup> and Rainer Streibel<sup>\*a</sup>

Received (in XXX, XXX) Xth XXXXXXXXXX 200X, Accepted Xth XXXXXXXXXX 200X

First published on the web Xth XXXXXXXXXX 200X

DOI: 10.1039/b000000x

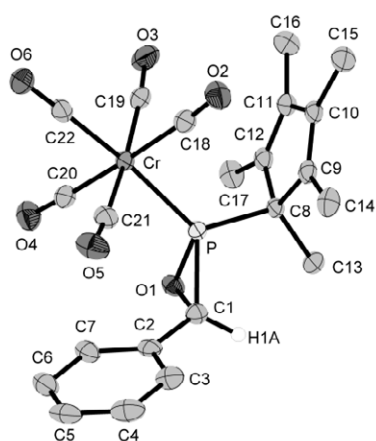

**Fig. 1** Molecular structure of complex **8a** in the crystal (50 % probability level; hydrogen atoms except H1A are omitted for clarity).

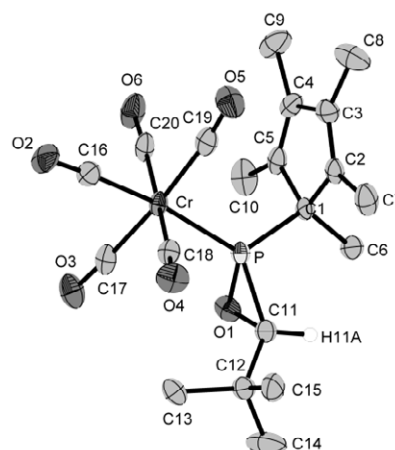

**Fig. 2** Molecular structure of complex **8b** in the crystal (50 % probability level; hydrogen atoms except H1A are omitted for clarity).

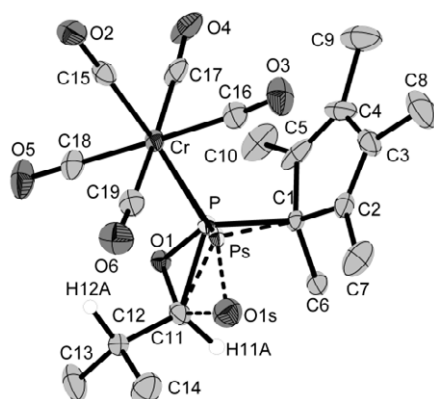

**Fig. 3** Molecular structure of complex **8c** in the crystal (50 % probability level; hydrogen atoms except H11A and H12A are omitted for clarity).

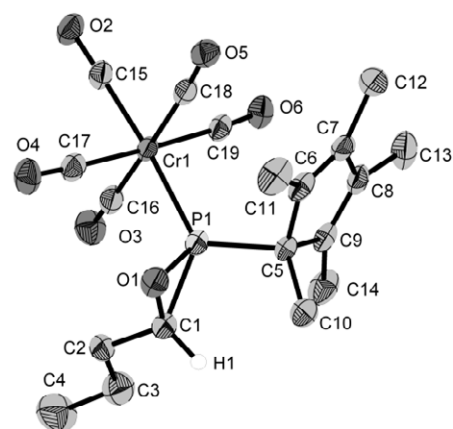

**Fig. 4** Molecular structure of one independent molecule of complex **8d** in the crystal (50 % probability level; hydrogen atoms except H11A and H12A are omitted for clarity).

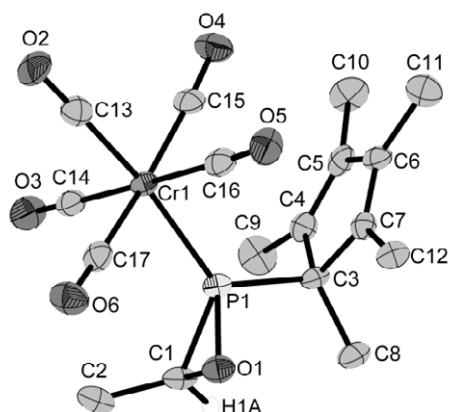

**Fig. 5** Molecular structure of one independent molecule of complex **8e** in the crystal (50 % probability level; hydrogen atoms except H1A are omitted for clarity).

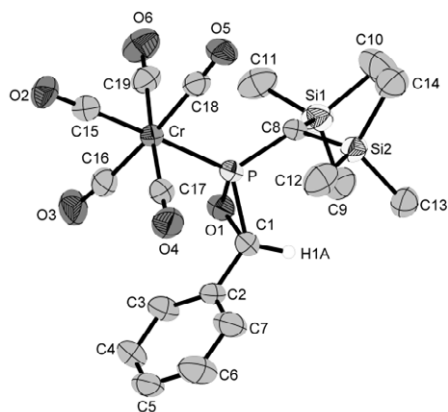

**Fig. 6** Molecular structure of complex **9a** in the crystal (50 % probability level; hydrogen atoms except H1A are omitted for clarity).

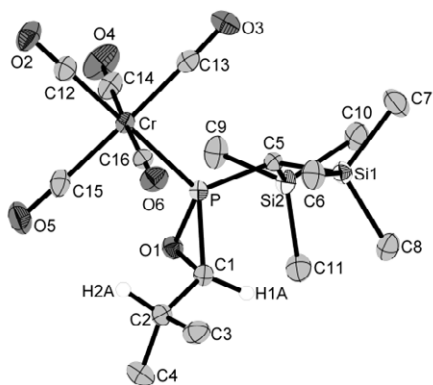

**Fig. 7** Molecular structure complex **9c** in the crystal (50 % probability level; hydrogen atoms except H1A and H2A are omitted for clarity).

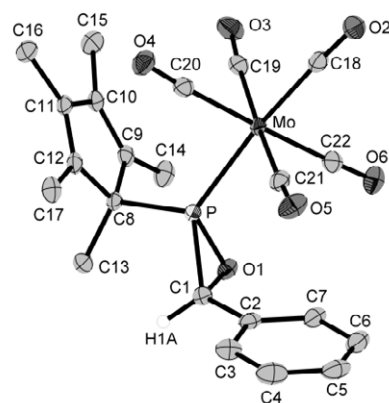

**Fig. 8** Molecular structure of complex **15a** in the crystal (50 % probability level; hydrogen atoms except H1A are omitted for clarity).

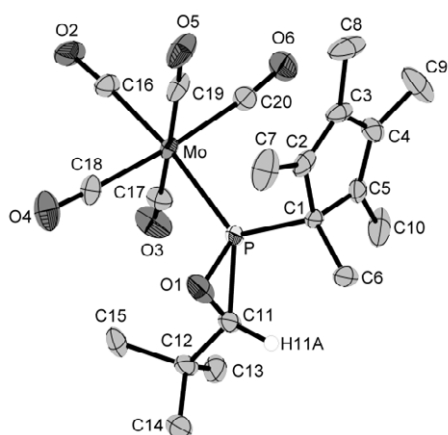

**Fig. 9** Molecular structure of complex **15b** in the crystal (50 % probability level; hydrogen atoms except H11A are omitted for clarity).

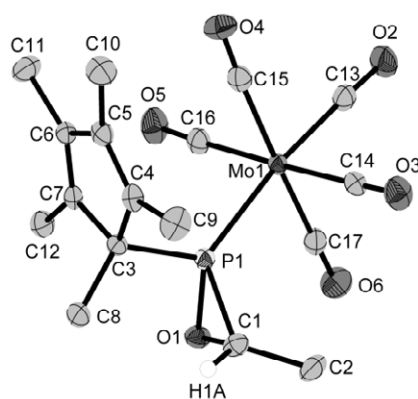

**Fig. 10** Molecular structure of one independent molecule of complex **15e** in the crystal (50 % probability level; hydrogen atoms except H1A are omitted for clarity).

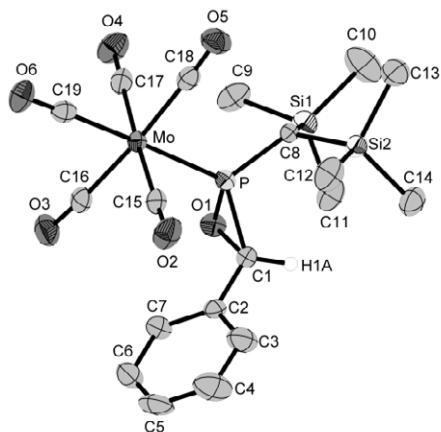

**Fig. 11** Molecular structure of complex **16a** in the crystal (50 % probability level; hydrogen atoms except H1A are omitted for clarity).

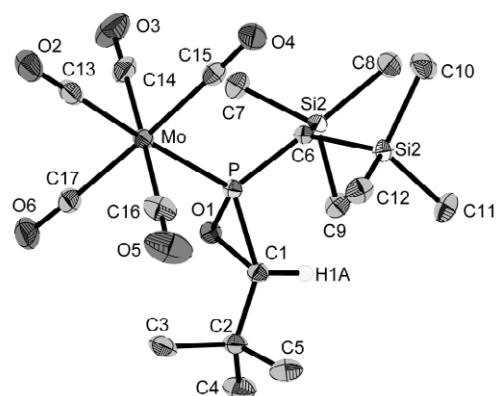

**Fig. 12** Molecular structure of complex **16b** in the crystal (50 % probability level; hydrogen atoms except H1A are omitted for clarity).

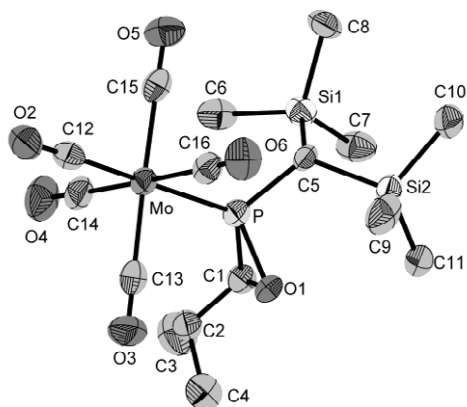

**Fig. 13** Molecular structure of one independent molecule of complex **16c** in the crystal.
